# Supplementary material for: The ANISEED database: Digital representation, formalization, and elucidation of a chordate developmental program
Source: HighWire-hosted journal article supplement (doi:10.1101/gr.108175.110), 2010-07-20
Supplement: aniseed_v3.0_source.zip [file Access data in Aniseed.pdf › aniseed_v3.0_source/aniseed_website/Access data in Aniseed.pdf]

Dear all,

Full ORF Gateway-compatible clones and KH transcript models are now accessible from the Aniseed website, in addition to their representation in the Aniseed Genome browser.

The following instructions will help you to find information concerning Gateway-compatible clones and KH transcript models. Don't hesitate to send us feedback or comments, especially if you find some bugs or inconsistencies.

### Information available in Aniseed:

*Full ORF gateway-compatible clones (Rothbacher et al., in preparation)*

- Library clone name (e.g. cima810896 ; cien56376)
- JGI/Gilchrist clone name (e.g. CBWU10896 ; XABT56376)
- Plate position (e.g. VES58\_F02)
- Genbank entry (e.g. FF864681)
- Sequence
- Library/Origin
- Vector

*KH transcript models (Satou et al., 2008)*

- DNA sequence
- Amino acid sequence

### How to access this information?

Access this information in Aniseed (<http://crfb.univ-mrs.fr/aniseed/>)

Schematic overview:

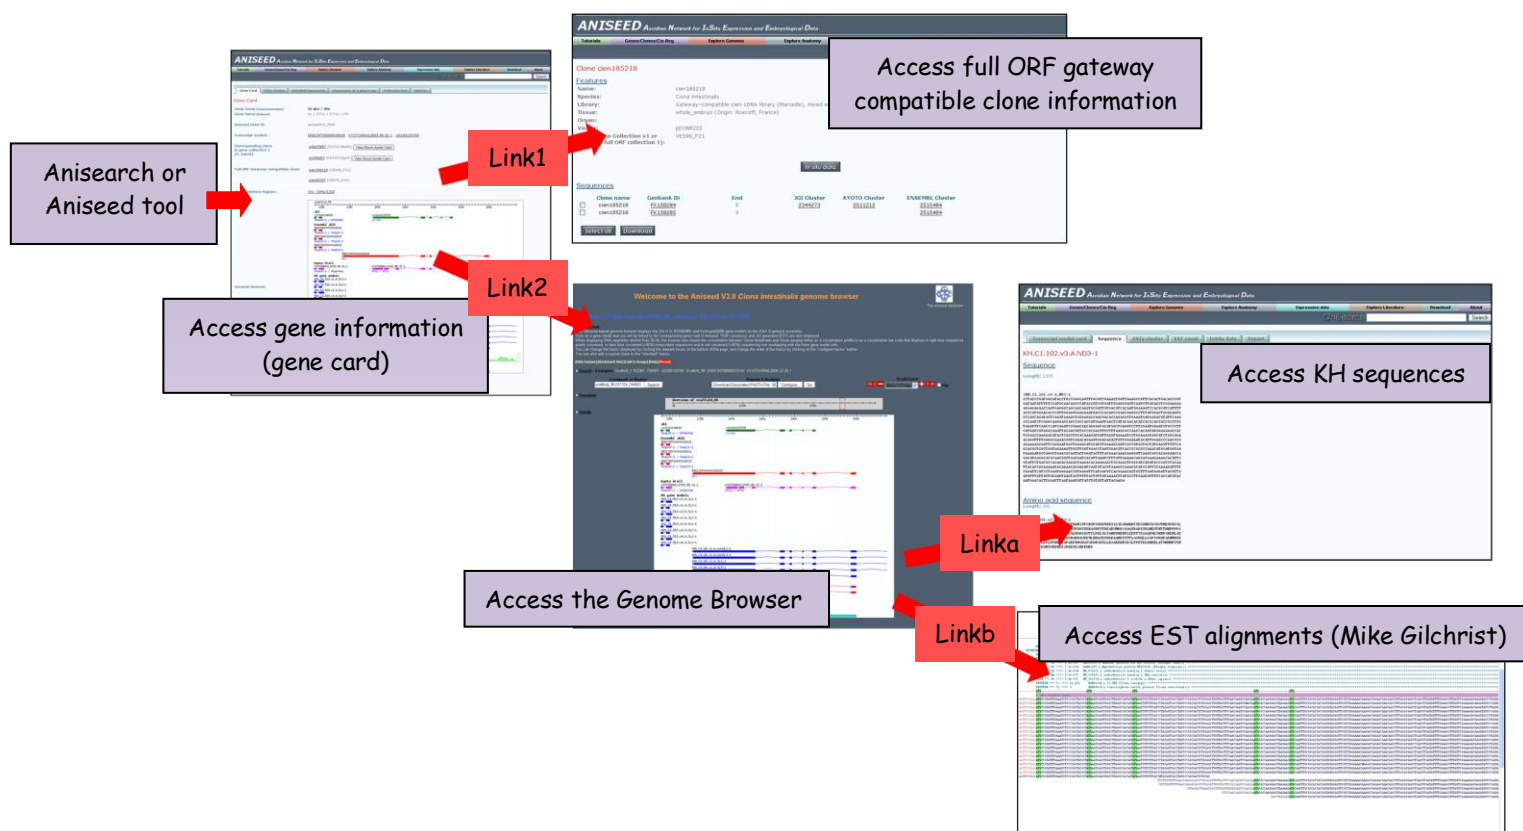

## Access gene information (gene card)

You can access gene features (gene card) using AniSearch or using the menu "Genes/Clones/Cis-reg menu".

- Using AniSearch:

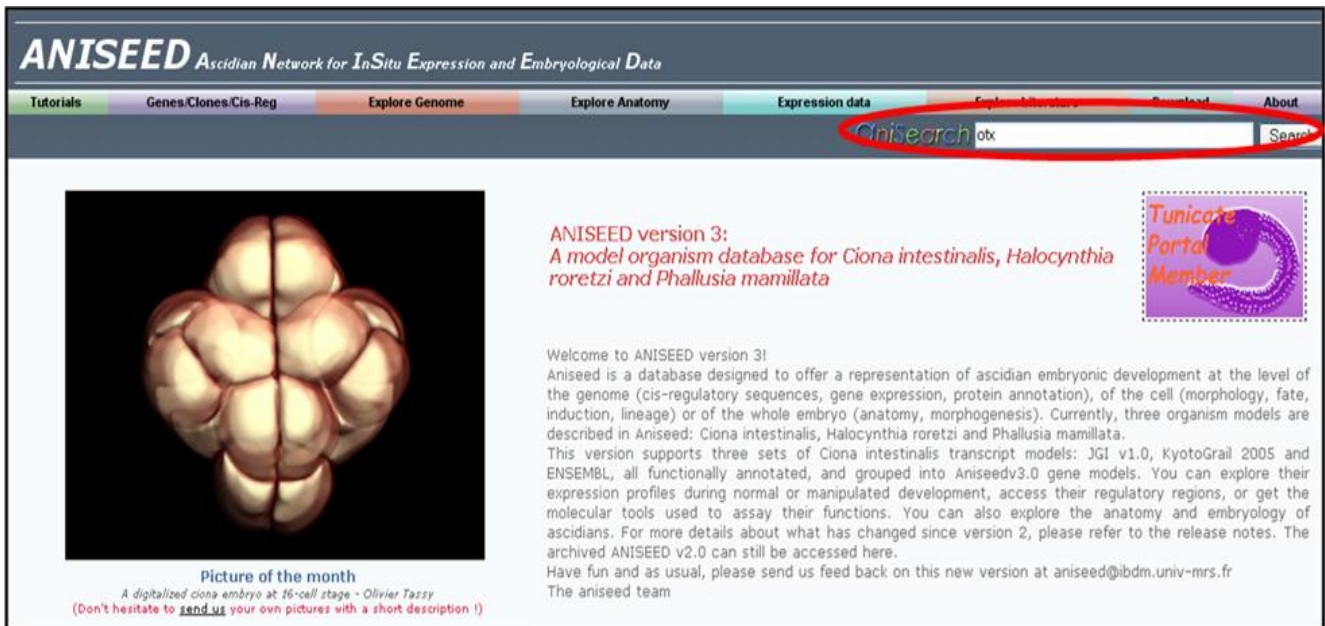

**ANISEED** *Ascidian Network for InSitu Expression and Embryological Data*

Tutorials Genes/Clones/Cis-Reg Explore Genome Explore Anatomy Expression data Explore Literature Download About

AniSearch otx Search

**Picture of the month**  
A digitalized ciona embryo at 16-cell stage - Olivier Tassy  
(Don't hesitate to send us your own pictures with a short description !)

**ANISEED version 3:**  
*A model organism database for Ciona intestinalis, Halocynthia roretzi and Phallusia mamillata*

Welcome to ANISEED version 3!  
Aniseed is a database designed to offer a representation of ascidian embryonic development at the level of the genome (cis-regulatory sequences, gene expression, protein annotation), of the cell (morphology, fate, induction, lineage) or of the whole embryo (anatomy, morphogenesis). Currently, three organism models are described in Aniseed: Ciona intestinalis, Halocynthia roretzi and Phallusia mamillata. This version supports three sets of Ciona intestinalis transcript models: JGI v1.0, KyotoGrail 2005 and ENSEMBL, all functionally annotated, and grouped into Aniseedv3.0 gene models. You can explore their expression profiles during normal or manipulated development, access their regulatory regions, or get the molecular tools used to assay their functions. You can also explore the anatomy and embryology of ascidians. For more details about what has changed since version 2, please refer to the release notes. The archived ANISEED v2.0 can still be accessed here.  
Have fun and as usual, please send us feed back on this new version at aniseed@ibdm.univ-mrs.fr  
The aniseed team

**Tunicate Portal Member**

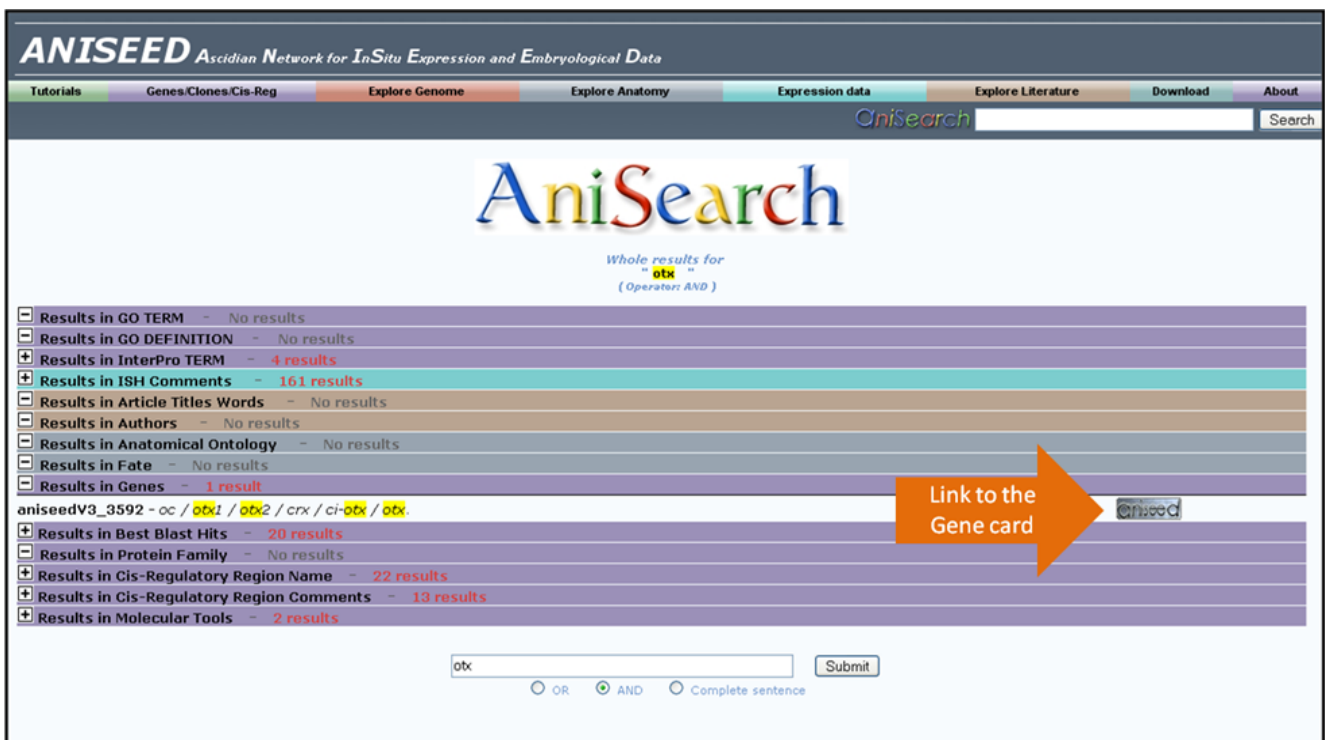

**ANISEED** *Ascidian Network for InSitu Expression and Embryological Data*

Tutorials Genes/Clones/Cis-Reg Explore Genome Explore Anatomy Expression data Explore Literature Download About

AniSearch Search

**AniSearch**  
Whole results for "otx"  
(Operator: AND)

- Results in GO TERM - No results
- Results in GO DEFINITION - No results
- Results in InterPro TERM - 4 results
- Results in ISH Comments - 161 results
- Results in Article Titles Words - No results
- Results in Authors - No results
- Results in Anatomical Ontology - No results
- Results in Fate - No results
- Results in Genes - 1 result

aniseedV3\_3592 - oc / otx1 / otx2 / crx / ci-otx / otx.

- Results in Best Blast Hits - 20 results
- Results in Protein Family - No results
- Results in Cis-Regulatory Region Name - 22 results
- Results in Cis-Regulatory Region Comments - 13 results
- Results in Molecular Tools - 2 results

otx Submit

OR AND Complete sentence

**Link to the Gene card**

- Using the Genes/Clones/Cis-reg menu, select the "Find a gene" link:

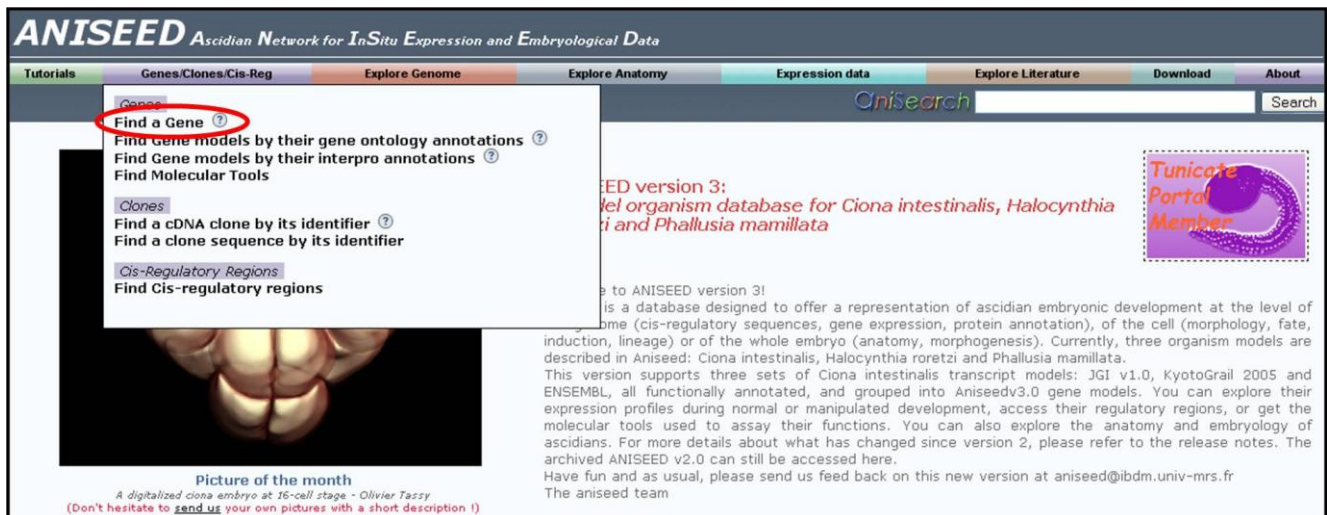

- o Choose an "Ascidian species" from the menu by clicking on the arrows and scrolling down.
- o Enter the biological name (otx) or the identifier of the gene model (ENSEMBL, JGI v1.0, KYOTOGRAIL2005, KH) you are looking for and click on the "Submit" button to access the gene card.

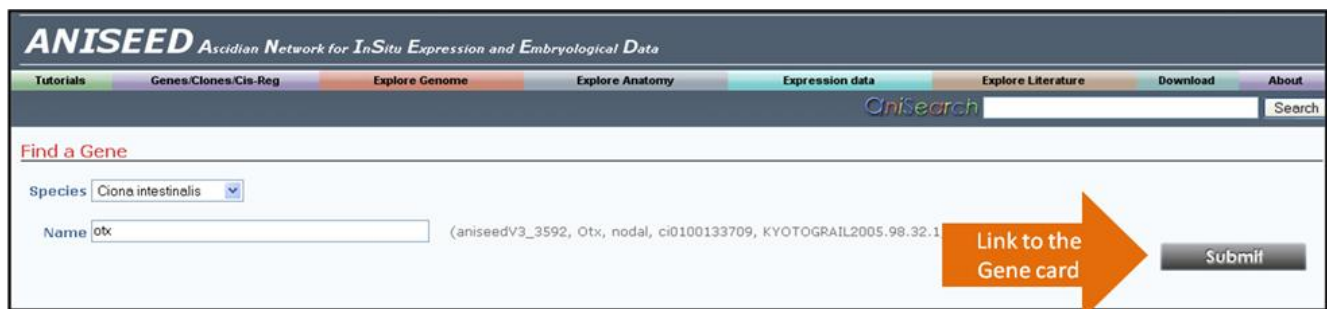

The gene card gives access to functional annotation of the gene (name, ortholog in mouse, human and Drosophila, interpro domains and Gene Ontology classification), corresponding transcript models, clones and regulatory regions and to an overview of the Genome browser. Thus, you can access from the gene card to corresponding full ORF gateway-compatible clone information and to the Genome browser:

# Otx Gene card

**ANISEED** *Ascidian Network for InSitu Expression and Embryological Data*

|           |                       |                |                 |                 |                    |          |       |
|-----------|-----------------------|----------------|-----------------|-----------------|--------------------|----------|-------|
| Tutorials | Genes/Clauses/Cis-Reg | Explore Genome | Explore Anatomy | Expression data | Explore Literature | Download | About |
|-----------|-----------------------|----------------|-----------------|-----------------|--------------------|----------|-------|

CniSearch  Search

---

**Gene Card** | ESTs cluster | Detailed Expression | Expression at a glance *New* | Molecular tool | Articles

### Gene Card

**Gene Name (Manual Annotation):** Ci-otx / Otx  
**Gene Name (Inferred):** oc / OTX1 / OTX2 / CRX

**Aniseed Gene id:** aniseedV3\_3592

**Transcript models :** ENSICNT00000018028 , KYOTOGRAIL2005.98.32.1 , ci0100133709

**Corresponding clone in gene collection 1 (N. Satoh)**  
[citb070007](#) (R1CIGC46a06) [View Ghost cluster Card](#)  
[ci0145e03](#) (R1CIGC13g19) [View Ghost cluster Card](#)

**Full ORF Gateway-compatible clone**  
[cien185218](#) (VES98\_F21)  
[cien60357](#) (VES79\_D19)

**Cis-regulatory regions:** [Otx -3541/1333](#)

**Genome Browser**

**Link 1: Access to clone features**

**Link 2: Access to Gbrowse**

## Access full ORF gateway compatible clone information from the gene card (link 1)

"Link 1" will give you access to clone features: the corresponding page displays some features like the library where the clone came from, the vector used, the plate position in the Unigene collection. You will also find the different clone sequences corresponding to the clone and the cluster that the clone belongs to from the three assemblies.

Otx Gene card

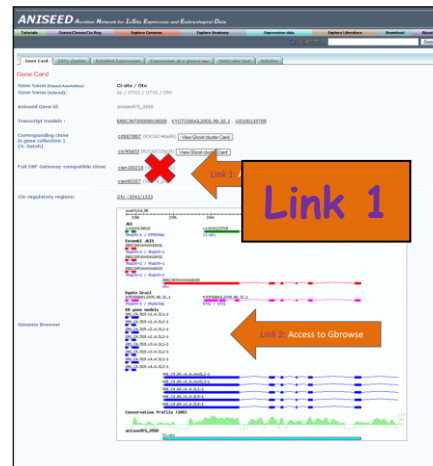

Link 1

**Clone cien185218**

**Features**

- Name: cien185218 (Library clone name)
- Species: Ciona intestinalis
- Library: Gateway-compatible cien cDNA library (Marseille), mixed embryo (Library / Origin) (157985 clones)
- Tissue: whole\_embryo (whole embryo)
- Organ: pDONR222 (Vector and plate position)
- Vector: VES98\_F21
- Plate (Gene Collection v1 or Gateway full ORF collection 1):

**In situ data** (Link to in situ data)

**Sequences**

| Clone name                          | Genbank ID                                                     | JGI Cluster             | KYOTO Cluster           | ENSEMBL Cluster                                               |
|-------------------------------------|----------------------------------------------------------------|-------------------------|-------------------------|---------------------------------------------------------------|
| <input type="checkbox"/> cien185218 | <a href="#">FK158284</a> (Genbank ID linked to clone features) | <a href="#">2344273</a> | <a href="#">2511212</a> | <a href="#">2515484</a> (Link to JGI, KYOTO, ENSEMBL cluster) |
| <input type="checkbox"/> cien185218 | <a href="#">FK158285</a>                                       |                         |                         |                                                               |

Select all Download

If you click on the Genbank ID:



ANISEED

Ascidian Network for *InSitu* Expression and Embryological Data

Tutorials

Genes/Clones/Cis-Reg

Explore Genome

Explore Anatomy

Expression data

Explore Literature

Download

About

Chisearch

Search

FK158284 cien185218

Library clone name

Features

Name:

Species:

Description:

Sequence type:

Orientation:

Genbank ID:

Cluster JGI:

Cluster Kyoto:

Cluster ENSEMBL:

Clone name:

Library:

Tissue:

Organ:

Vector:

Corresponding gene:

Corresponding JGI transcript:

Corresponding KYOTOGRAIL transcript:

Corresponding ENSEMBL transcript:

Ciona intestinalis

gil192949931|gb|FK158284.1|FK158284.XABT185218.b1 Gateway

intestinalis mixed embryonic stages (Egg to Neurula) Ciona intestinalis

sequence

cDNA

5

FK158284

2344273

2511212

2515484

cien185218

Gateway-compatible cien cDNA library (Marseille), pDONR222

whole\_embryo (Origin: Roscoff, France)

pDONR222

aniseedV3\_3592 ( oc / OTX1 / OTX2 / CRX / Ci-otx / Otx )

Description + JGI Gilchrist clone name

Link to JGI, KYOTO, ENSEMBL clustering

Library / Origin

Link to the gene card

In situ data

Link to in situ data

Sequence

Length: 673

ACCTGAT AATTTT GAAAAAT AGAGGTTT ATT AAATTT OT AAAAT AAGTT GATT GATT ACA
TCT ACAAGC AAGAGTTT GAAAAAT AAAAAT CAAGTT GAAAAAC GAAGCATTTT GAACG
AAAAAC AATTT CATTT CAAGT ACCACGGGTT CAATTCCTAACATGTCGATTTT GAATCT
CCCCACTACGCTATGAATGGACTGGGCTT AGGCCACGAT ATGAATCTCTTCACCTACAG
TCACCTATCCCGGCACTCTGCAGCTTGTACTTCCACAGANTCCAAGGAATGCACCAAGG
AGCTAAGAACATGCAATTTGGGGCCACCAGTATACAGTTCTGTCTAGAAAAACAAAGGCGA
GAGCGAACGACCTTCACACGAGCTCAACTCGATATTTTGGAGGTTTATTCCGGAAGACAA
GATATCCGAGATCTTTAGAGAGAAAGATTTGCCCTAAGAGTCAACTTCCAGAGTCCCG
AGTACAGGTGTGGTTCAAAATCSAGCAGCAAGGTCTGCCAAGAGTGCACACACAG
CAAAACAAAAATCCGGCTAGGTGGCAGTTCATCTATTCAAGCAGTACTGCTAGCA
GCAGCAGCGGAAGCGCCAGCAGCACCAACAGCAACANTAATAGCTCATCAAGTTCAANTAA
GA

Display entry in raw text format

Sequence

This page gives you an access point to clone features including a brief description (including the JGI/Gilchrist clone name), the type of sequence (EST or cDNA) and corresponding orientation (5' or 3' end). You can also directly link to Genbank information by clicking on the Genbank ID. You retrieve the library used, the vector used, the tissue or the organ that it comes from. There are also the gene model corresponding to the clone sequence and when available, a link to the in situ data. Finally, you can find the sequence. All the information of this page can be exported in raw text format by clicking on "Display entry in raw text format" at the bottom.

PS: you can also access clone features using the Genes/Clones/Cis-reg link in the Aniseed menu. Note that if you use the "find a cDNA clone by its identifier" link, you have to enter the exact clone name in the corresponding field (e.g. cien177890) and if you use the "find a clone sequence" link, you have to enter the Genbank ID (e.g. FK050052) :

**ANISEED** Ascidian Network for InSitu Expression and Embryological Data

Tutorials Genes/Clones/Cis-Reg Explore Genome Explore Anatomy Expression data Explore Literature Download About

Find a Gene  
Find Gene models by their gene ontology annotations  
Find Gene models by their interpro annotations  
Find Molecular Tools  
**Find a cDNA clone by its identifier**  
Find a clone sequence by its identifier

ED version 3:  
Model organism database for *Ciona intestinalis*, *Halocynthia*  
*irradiata* and *Phallusia mamillata*

**ANISEED** Ascidian Network for InSitu Expression and Embryological Data

Tutorials Genes/Clones/Cis-Reg Explore Genome Explore Anatomy Expression data Explore Literature Download About

Clone search

Species: *Ciona intestinalis*

Name: cien185218 (0022E11, cic01106 ...)

**ANISEED** Ascidian Network for InSitu Expression and Embryological Data

Tutorials Genes/Clones/Cis-Reg Explore Genome Explore Anatomy Expression data Explore Literature Download About

You can either click on the transcript name of interest to get the associated transcript card, or tick right of the transcript ID name to constitute a list of transcripts of interest that can be further restricted using the "Refine" button that enables sequential requests.

Matching records

Clone name: cien185218

Species: *Ciona intestinalis*

**ANISEED** Ascidian Network for InSitu Expression and Embryological Data

Tutorials Genes/Clones/Cis-Reg Explore Genome Explore Anatomy Expression data Explore Literature Download About

Clone cien185218

**Features**

Name: cien185218  
Species: *Ciona intestinalis*  
Library: Gateway-compatible cien cDNA library (Marseille), mixed embryonic stages (Egg to Neurula) (157985 clones)  
Tissue: whole\_embryo (Origin: Roscoff, France)  
Organ:  
Vector: pDONR222  
Plate (Gene Collection v1 or Gateway full ORF collection 1): VES98\_F21

**In situ data**

**Sequences**

| Clone name                          | Genbank ID | End | JGI Cluster | KYOTO Cluster | ENSEMBL Cluster |
|-------------------------------------|------------|-----|-------------|---------------|-----------------|
| <input type="checkbox"/> cien185218 | FK158284   | 5   | 2344273     | 2511212       | 2515484         |
| <input type="checkbox"/> cien185218 | FK158285   | 3   |             |               | 2515484         |

Select all Download

## Access the Genome Browser from the gene card (link 2)

"Link 2" will give you access to the Genome Browser: the corresponding page displays the JGI v1.0, ENSEMBL Kyotograil2005 and KH gene models on the JGIv1.0 genome assembly. Click on a gene model and you will be linked to the corresponding gene card in Aniseed (see "link a" in the following figures). Move down to the « tracks » section and tick the 'Full ORF Gateway clones (Mike Gilchrist)' in the « ESTs and cDNAs (and other Gene models) » section. Update the image to show the track on the browser and then you can visualize Full ORF gateway clones. Click on a clone and you will be linked to the EST alignments of Mike Gilchrist (see "link b" in the following figures).

Otx Gene card

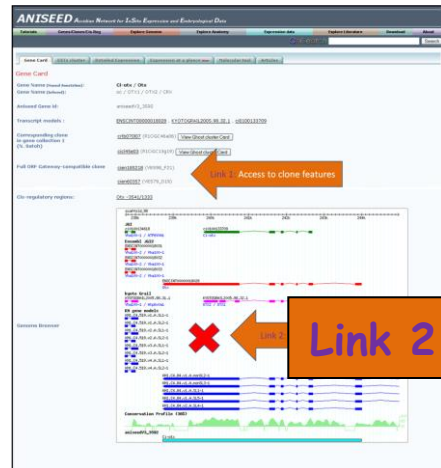

Link 2

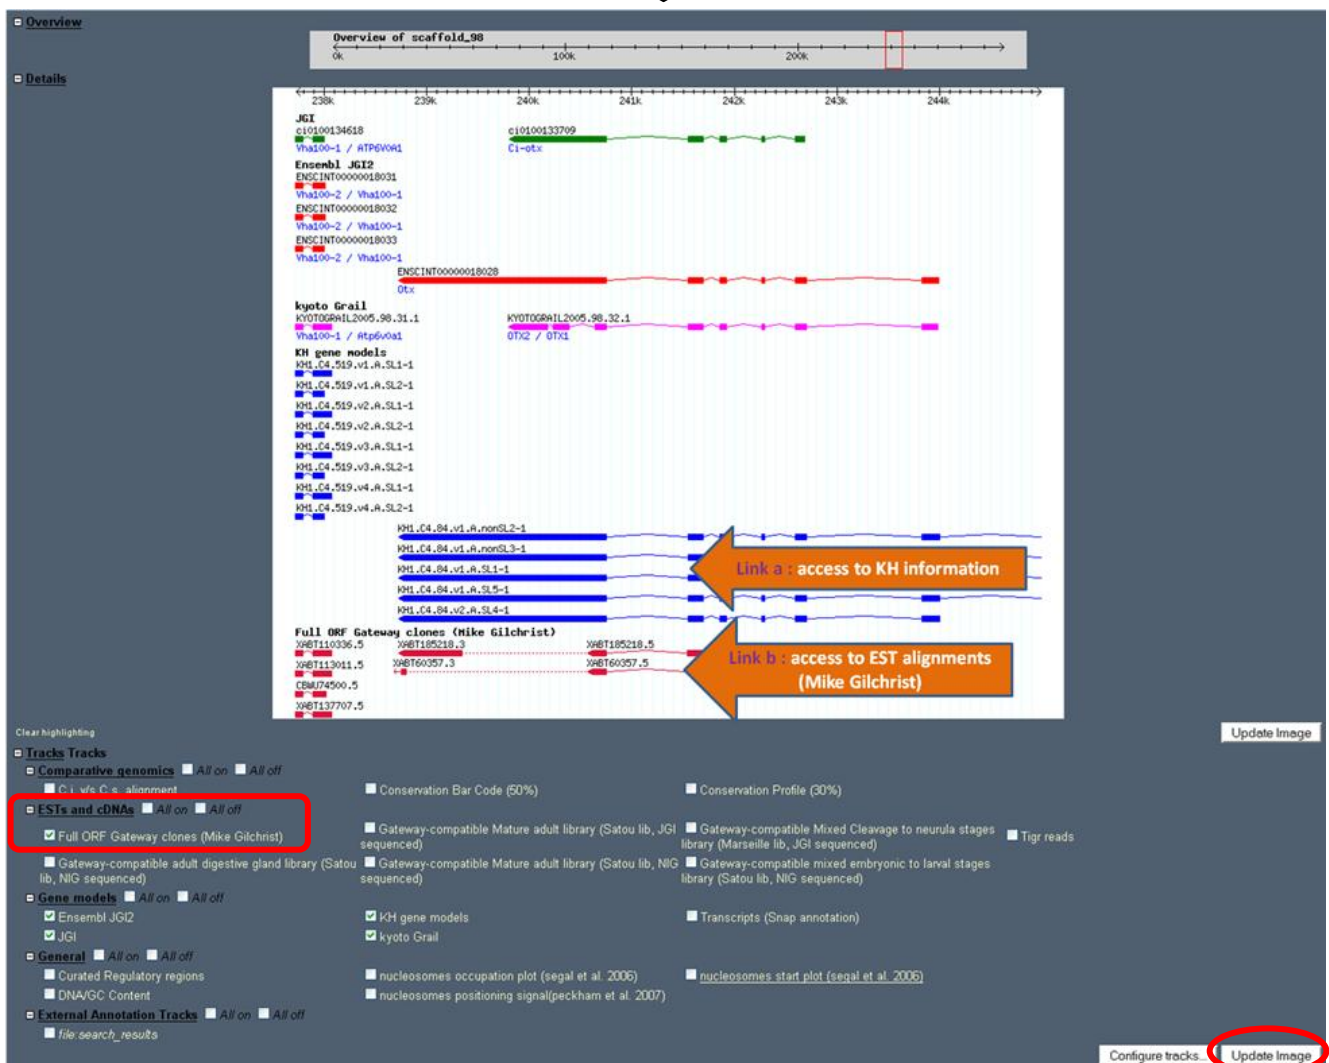

Gbrowse showing scaffold\_98, positions 237.724 to 244.993



"Link a" will give you access to corresponding gene card. Here, you can access the sequence (nucleotide and amino acid).

*Gbrowse showing scaffold\_98*

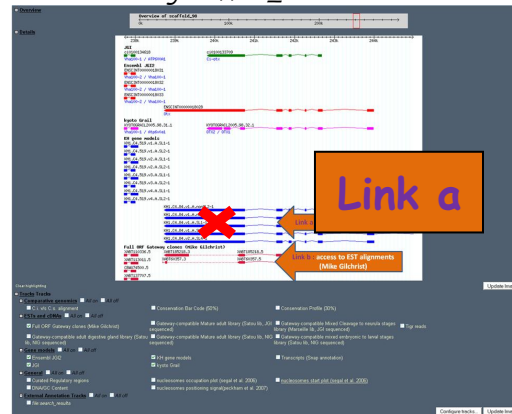

↓ Link a

ANISEED

*Ascidian Network for InSitu Expression and Embryological Data*

Tutorials

Genes/Clones/Cis-Reg

Explore Genome

Explore Anatomy

Expression data

Explore Literature

Download

About

OniSearch

Transcript model card

Sequence

ESTs cluster

EST count

InSitu data

Export

KH.C4.84.v1.A.SL1-1

This page gives access to the functional annotation (name, scaffold, orthologues in mouse, human and drosophila, best blast hit in Swissprot, interpro domains and Gene Ontology classification). The other tabs give access to the sequence (nucleotide and aa), associated ESTs, EST counts in the various sequenced libraries, in situ data in WT and manipulated conditions, molecular tools (morpholinos, full length Gateway clones), microarray probes (to be implemented). The genomic annotations can be exported as a flat file via the export tab.

**Features**

Transcript model ID: KH.C4.84.v1.A.SL1-1

Possible biological name (manual annotation)\*:

Possible biological name:

Aniseed Gene model: No match

Description:

Species: Ciona intestinalis

Scaffold:

Chr. number:

Strand:

[illegible]

*PS: you can also access the KH features using the "find a gene" link in the Genes/Clones/Cis-reg menu and entering the KH identifier in the corresponding box (see the "access gene information" section).*

# Access EST alignments from Gbrowse (link b)

"Link b" will give you access to the EST alignments of Mike Gilchrist.

Gbrowse showing scaffold\_98

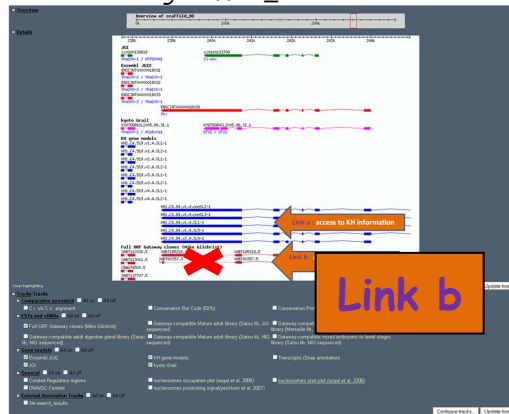

Link b

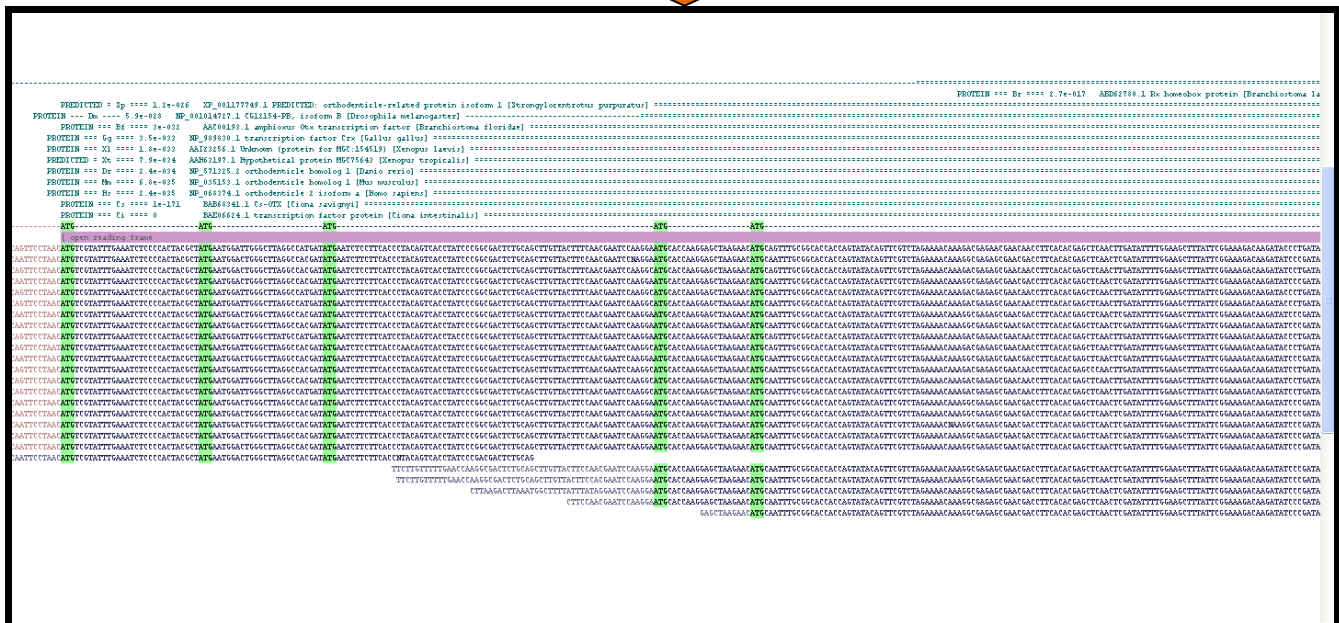

Don't hesitate to ask us if you cannot place a request you would like on ANISEED.

Delphine Dauga, 20th january 2009  
[dauga@ibdm.univ-mrs.fr](mailto:dauga@ibdm.univ-mrs.fr)
